# Supplementary material for: Transcriptional Profiles Elucidate Differential Host Responses to Infection with Cryptococcus neoformans and Cryptococcus gattii
Source: MDPI journal article supplement (doi:10.3390/jof8050430), 2022-04-22
Supplement: s1 [file s1]

**Supplemental Table S1. Genes of the *Cryptococcus* Classifier**

| <b>Genes</b> |
|--------------|
| Cmc2         |
| Ear1         |
| Il1rl1       |
| Klk1         |
| Slc16a3      |
| Dedd2        |
| Dnajb1       |
| Ccl6         |
| Camk1        |
| Zfp704       |
| Dffb         |
| Prkg2        |
| P2ry14       |
| Prrx1        |
| Klra19       |
| Hspa8        |
| Rab3c        |
| Cwfl19l1     |
| Arhgap29     |
| D6Ertd160e   |
| Neu1         |
| Rsrp1        |
| Cxcr4        |
| Retnla       |
| Ccdc117      |
| Arap2        |
| Mela         |

**Supplemental Table S2. Genes significantly expressed (p<0.05) in both PBMC (*Candida* and *Cryptococcus*) and Murine (*Cryptococcus*) Datasets**

| <b>Gene Symbol</b> | <b>Adjusted P Value PBMC Dataset</b> | <b>Adjusted P Value Murine Dataset</b> |
|--------------------|--------------------------------------|----------------------------------------|
| <b>Cmc2</b>        | 0.00120                              | 0.00444                                |
| <b>Il18r1</b>      | 0.00157                              | 0.01886                                |
| <b>Bhlhe40</b>     | 0.00017                              | 0.02290                                |
| <b>Myo10</b>       | 0.0000003                            | 0.02433                                |
| <b>Cmc2</b>        | 0.00120                              | 0.02648                                |
| <b>Mphosph9</b>    | 0.00202                              | 0.03017                                |
| <b>Dnajb1</b>      | 0.02913                              | 0.03017                                |
| <b>Tnfrsf1b</b>    | 0.03787                              | 0.03062                                |
| <b>Dag1</b>        | 0.00170                              | 0.03342                                |
| <b>Glr2</b>        | 0.00245                              | 0.03342                                |
| <b>Tnfrsf25</b>    | 0.04066                              | 0.03342                                |
| <b>Rsrp1</b>       | 0.00700                              | 0.03494                                |
| <b>Cxcr3</b>       | 0.01345                              | 0.03832                                |
| <b>Ets2</b>        | 0.01437                              | 0.03968                                |
| <b>Clcf1</b>       | 0.01101                              | 0.03981                                |
| <b>Arih2</b>       | 0.00001                              | 0.03987                                |
| <b>Fkbp11</b>      | 0.00251                              | 0.03987                                |
| <b>Creld2</b>      | 0.02583                              | 0.03987                                |
| <b>Tsc22d3</b>     | 0.01757                              | 0.04088                                |
| <b>Plxnc1</b>      | 0.00017                              | 0.04170                                |
| <b>Pld1</b>        | 0.00202                              | 0.04170                                |
| <b>Creb3l2</b>     | 0.02475                              | 0.04170                                |
| <b>Il2rb</b>       | 0.00103                              | 0.04240                                |
| <b>Smad7</b>       | 0.01079                              | 0.04268                                |
| <b>Ccl24</b>       | 0.00045                              | 0.04321                                |
| <b>Slc20a1</b>     | 0.01626                              | 0.04355                                |
| <b>Dag1</b>        | 0.00170                              | 0.04548                                |
| <b>Il10ra</b>      | 0.02082                              | 0.04548                                |
| <b>Dpagt1</b>      | 0.00225                              | 0.04565                                |
| <b>Nagk</b>        | 0.00552                              | 0.04592                                |
| <b>Fut8</b>        | 0.00666                              | 0.04592                                |
| <b>Rps6kb2</b>     | 0.02114                              | 0.04791                                |
| <b>Dnajb1</b>      | 0.02913                              | 0.04850                                |
| <b>Clk1</b>        | 0.00116                              | 0.04853                                |
| <b>Ddb2</b>        | 0.00128                              | 0.04853                                |

|                |          |         |
|----------------|----------|---------|
| <b>Il18</b>    | 0.00004  | 0.04908 |
| <b>Spry2</b>   | 0.00001  | 0.04908 |
| <b>Nid1</b>    | 0.00002  | 0.04908 |
| <b>Tnrc6b</b>  | 0.00004  | 0.04908 |
| <b>Emc2</b>    | 0.00009  | 0.04908 |
| <b>Dnajb6</b>  | 0.00113  | 0.04908 |
| <b>Ctla4</b>   | 0.00176  | 0.04908 |
| <b>Pld1</b>    | 0.00202  | 0.04908 |
| <b>Tgfbr1</b>  | 0.00238  | 0.04908 |
| <b>Cryl1</b>   | 0.00341  | 0.04908 |
| <b>Adcy3</b>   | 0.00369  | 0.04908 |
| <b>Jarid2</b>  | 0.00716  | 0.04908 |
| <b>Unc45a</b>  | 0.00763  | 0.04908 |
| <b>Spn</b>     | 0.01271  | 0.04908 |
| <b>Atp2a2</b>  | 0.01273  | 0.04908 |
| <b>Hdgf</b>    | 0.01459  | 0.04908 |
| <b>Snapc3</b>  | 0.01471  | 0.04908 |
| <b>St3gal6</b> | 0.01722  | 0.04908 |
| <b>Hspa5</b>   | 0.01791  | 0.04908 |
| <b>Arhgef2</b> | 0.03035  | 0.04908 |
| <b>Clk4</b>    | 0.00006  | 0.04911 |
| <b>Impad1</b>  | 0.02438  | 0.04937 |
| <b>Myc</b>     | 0.000005 | 0.04989 |
| <b>Txndc9</b>  | 0.00009  | 0.04989 |
| <b>Morf4l2</b> | 0.00046  | 0.04989 |
| <b>Cept1</b>   | 0.00078  | 0.04989 |
| <b>Ddb2</b>    | 0.00128  | 0.04989 |
| <b>Smyd2</b>   | 0.00555  | 0.04989 |
| <b>Atp5o</b>   | 0.00587  | 0.04989 |
| <b>Prkacb</b>  | 0.00746  | 0.04989 |
| <b>Ufsp2</b>   | 0.00774  | 0.04989 |
| <b>Clcf1</b>   | 0.01101  | 0.04989 |
| <b>Dhx30</b>   | 0.01175  | 0.04989 |
| <b>Stk17b</b>  | 0.01218  | 0.04989 |
| <b>Sell1</b>   | 0.01690  | 0.04989 |
| <b>Plcb1</b>   | 0.02065  | 0.04989 |
| <b>Dennd2d</b> | 0.03638  | 0.04989 |
| <b>Pde8a</b>   | 0.03645  | 0.04989 |
